# Supplementary material
Source: publisher site journal article supplement (https://www.dovepress.com/get_supplementary_file.php?f=300789.docx)
Supplement: Supplementary file 1 [file get_supplementary_file.php]

**Supplementary Appendix**

**E1** Supplementary baseline

|  | Total（N = 91） | Control Group | Glucocorticoid group |
| --- | --- | --- | --- |
|  | 91 | 39 | 52 |
| **Comorbidities, No./total (%)** |  |  |  |
| Hypertension | 15（16.5） | 7(17.9) | 8(15.4) |
| Diabetes | 4（4.4） | 1(2.6) | 3(5.8) |
| Gastritis | 26（28.6） | 10(25.6) | 16(30.8) |
| Cardiovascular disease | 10（11.0） | 5(12.8) | 5(9.6) |
| **Physical examination** |  |  |  |
| SP&(mmHg),median(IQR) | 120（110-130） | 120(110-130) | 120(112-130) |
| DP#(mmHg),median(IQR) | 70（68-80） | 72(68-80) | 70(67-80) |
| T，median（IQR) | 36.5（36.2-37.0） | 36.6(36.3-37.8) | 36.4(36.1-37.0) |
| P，median（IQR) | 88（80-94） | 88(80-92) | 84（80-96） |
| R，median（IQR) | 21（21-21） | 21(20-21) | 21（21-21） |
| SPO2，median（IQR) | 96（93-97） | 95(92-97) | 96（93-97） |
| **Laboratory examination** |  |  |  |
| WBC,mean±SD | 9.29±3.64 | 9.47±3.54 | 9.16±3.75 |
| CRP，median（IQR) | 19（5-63） | 26(9-91) | 9（4-41）* |
| PCT,median (IQR) | 0.22（0.05-3.80） | 0.33(0.06-3.80) | 0.14(0.04-3.80) |
| **Blood gas analysis** |  |  |  |
| PO2，median（IQR) | 77（68-97） | 77(66-100) | 78（68-96） |
| PCO2，median（IQR) | 43（38-48） | 43(38-47) | 43（38.-49） |
| **Pulmonary function** |  |  |  |
| FEV1/FVC，median（IQR) | 0.49（0.38-0.64） | 0.47(0.37-0.63) | 0.50（0.43-0.69） |
| FVC（%）,mean±SD | 62.05±17.37 | 60.09±18.15 | 63.54±16.79 |
| DLCO（%）,mean±SD | 89.31±18.95 | 88.94±15.88 | 89.59±21.19 |
| **Types,No.(%)** |  |  |  |
| Obstruction. | 62（68.1） | 27(69.2) | 35(67.3) |
| Restriction. | 3（3.3） | 1(2.6) | 2(3.8) |
| Mixed | 26（28.6） | 11(28.2) | 15(28.8) |

Note: &SP represents systolic blood pressure, #SP represents diastolic blood pressure ,* means p<0.05

**E2** Details of glucocorticoid use

|  | **Glucocorticoid group** |
| --- | --- |
| N | 52 |
| MP， No. (%) | 17（18.7） |
| Prednisone， No. (%) | 1（1.1） |
| Budesonide， No. (%) | 20（22.0） |
| MP+ Prednisone， No. (%) | 2（2.2） |
| MP+ Budesonide， No. (%) | 11（12.1） |
| MP+ Prednisone+ Budesonide， No. (%) | 1（1.1） |
| **Hormone use time，day， No. (%)** |  |
| 1 | 2（3.8） |
| 2 | 1(1.9) |
| 4 | 5(9.6) |
| 5 | 6(11.5) |
| 6 | 3(5.8) |
| 7 | 4(7.7) |
| 8 | 3(5.8) |
| 9 | 6(11.5) |
| 10 | 3(5.8) |
| 11 | 5(9.6) |
| 12 | 2(3.8) |
| 13 | 4(7.7) |
| 14 | 2(3.8) |
| 15 | 3(5.8) |
| 16 | 1(1.9) |
| 17 | 1(1.9) |
| 24 | 1(1.9) |
| **Date and time from the date of admission to the use of hormones，day， No. (%)** | |
| 0 | 34（65.4） |
| 1 | 7(13.5) |
| 2 | 6(11.5) |
| 3 | 2(3.8) |
| 4 | 1(1.9) |
| 7 | 1(1.9) |
| 9 | 1(1.9) |

Note：Methylprednisolone (MP) 40mg ivgtt qd，Prednisone ：20mg po qd，Budesonide：2ml aerosol inhale bid

**E3** Severe deterioration rate of systemic corticosteroid group, local corticosteroid group and control group

|  | Control Group | Systemic hormone | Topical hormone |
| --- | --- | --- | --- |
| **COPD hospital readmissions** | 39 | 32 | 20 |
| Mean (95%CI) per participant | 0.67（0.38-0.96） | 0.19（0.02-0.36） | 0.40（0.08-0.72） |
| RR（95%CI) [Unadjusted] |  | 0.28(0.12-0.68) | 0.60(0.27-1.33) |
| **p** | Refer | 0.005 | 0.206 |
| RR(95%CI)[ adjusted] |  | 0.35（0.14-0.86） | 0.76（0.33-1.74） |
| **p** | Refer | 0.022 | 0.518 |

**E4** Sensitivity analysis 2: the severe deterioration rate of systemic corticosteroids, topical corticosteroids and control groups

|  | Control Group | Systemic hormone | Topical hormone |
| --- | --- | --- | --- |
| **COPD hospital readmissions** | 33 | 15 | 21 |
| Mean (95%CI) per participant | 0.64(0.33-0.94) | 0.14（-0.02-0.31） | 0.40（0.05-0.75） |
| RR（95%CI) [Unadjusted] |  | 0.22（0.07-0.75） | 0.63（0.25-1.56） |
| **p** | Refer | 0.016* | 0.629 |
| RR(95%CI) [ adjusted] |  | 0.27（0.08-0.93） | 0.78（0.30-2.01） |
| **p** | Refer | 0.038* | 0.609 |

Note: * means p<0.05
